# Supplementary material for: Comparison of decline in different cognitive domain in patients with normal pressure hydrocephalus
Source: Springer Nature journal article supplement (doi:10.1007/s10143-024-02410-3), 2024-04-17
Supplement: MOESM1 [file 26989910]

## Used manuals for neuropsychological tests:

|                |                                                                                                                                                                                                                                                                |
|----------------|----------------------------------------------------------------------------------------------------------------------------------------------------------------------------------------------------------------------------------------------------------------|
| TMT-A          | Bezdicek, O., Motak, L., Axelrod, B. N., Preiss, M., Nikolai, T., Vyhnaek, M., ... & Ruzicka, E. (2012). Czech version of the Trail Making Test: Normative data and clinical utility. <i>Archives of Clinical Neuropsychology</i> , 27(8), 906-914.            |
| TMT-B          | Bezdicek, O., Motak, L., Axelrod, B. N., Preiss, M., Nikolai, T., Vyhnaek, M., ... & Ruzicka, E. (2012). Czech version of the Trail Making Test: Normative data and clinical utility. <i>Archives of Clinical Neuropsychology</i> , 27(8), 906-914.            |
| AVLT           | Bezdicek, O., Stepankova, H., Motak, L., Bradley N. Axelrod, Woodard, John L., Preiss, M., Nikolai, T., Růžička, E. & Poreh A. (2014) Czech version of Rey Auditory Verbal Learning test: Normative data, Aging, Neuropsychology, and Cognition, 21:6, 693-721 |
| ROCFT          | Drozdova, K., Stepankova, H., Lukavsky, J., Bezdicek, O., & Kopecek, M. (2015). Normative data for the rey-osterrieth complex figure test in older Czech adults. <i>Ceska a Slovenska Neurologie a Neurochirurgie</i> , 78(5), 542-549.                        |
| Block design   | Černochová, D., Goldmann, P., Král, P., Soukupová, T., Šnorek, P., & Havlůj, V. (2010). Wechslerova inteligenční škála pro dospělé WAIS III. Praha. <i>Czech republic: Hogrefe-Testcentrum</i> .                                                               |
| Verbal Fluency | Nikolai, T., Štěpánková, H., Michalec, J., Bezdíček, O., Horáková, K., Marková, H., & Kopeček, M. (2015). Testy verbální fluence, česká normativní studie pro osoby vyššího věku. <i>Česká a slovenská neurologie a neurochirurgie</i> , 78, 111(3), 292-299.  |
